# Supplementary material
Source: PubMed Central journal article supplement (PMC4620663)

monocular deprivation is reversed by dark exposure and reverse deprivation,  $*p < 0.020$ , KS test.

Figure 5: Enhancement of the thalamocortical VEP in the deprived visual cortex during the recovery from chronic monocular deprivation. A. Top: Post stimulus time histograms plot action potentials (in 50 ms bins) versus time using a visual stimulus reversing every 500 ms (arrows). Intracortical infusion of muscimol+SCH50911 induces a reversible silencing of cortical spiking and reduction in VEP amplitude. Cortical spiking and VEP amplitude recover following washout (~ 10 hours), scale bars = 50 ms, 50  $\mu$ volts. B and C. Pharmacological isolation of the thalamocortical VEP in subjects that received chronic monocular deprivation and chronic monocular deprivation followed by dark exposure and reverse deprivation ( $*p < 0.005$  paired t-test). D. Normalization of the thalamocortical VEP to the total cortical VEP reveals the recovery from chronic monocular deprivation is accompanied by an enhancement of thalamocortical VEP amplitude ( $*p = 0.027$  unpaired t-test). E. Inhibition of cortical spiking does not modify the VEP contralateral bias in subjects that received chronic monocular deprivation, or after chronic monocular deprivation is reversed by dark exposure and reverse deprivation.

Supplemental figure 1: Dendritic spines in the visual cortex ipsilateral to the occluded eye (non-deprived cortex) are stable across experimental conditions, until anatomical plasticity is reactivated by dark exposure in adulthood. A. Experimental timeline. B. Representative DiI labeled basolateral dendrites from pyramidal neurons in the binocular region of the non-deprived visual cortex (ipsilateral to occlusion) in control, chronically monocularly-deprived (Nondep cMD), chronically monocularly-deprived plus dark exposure (Nondep cMD DE) and chronically monocularly-deprived plus dark exposure and reverse deprivation (Nondep cMD DE-RD). In each case the dendritic segment shown is 75–100  $\mu$ m from cell body. C. No change in spine density (0-100  $\mu$ m from the soma) in the non-deprived cortex following chronic monocular deprivation or dark exposure. However a reduction in dendritic spine density was observed along segments of non-deprived visual cortex when chronic monocular deprivation as followed by dark exposure and reverse deprivation (average  $\pm$  SEM 0-25  $\mu$ m control=0.16 $\pm$ 0.02,

Nondep=0.16±0.02, Nondep DE=0.13±0.01, Nondep DE-RD=0.08±0.02; one-way ANOVA,  $F_{(3,69)}=3.4272$ ,  $p=0.0220$ , \* $p<0.05$  versus control, Tukey-Kramer HSD post-hoc; 25-50  $\mu\text{m}$  control=0.67±0.04, Nondep=0.64±0.06, Nondep DE=0.52±0.04, Nondep DE-RD=0.44±0.08; one-way ANOVA,  $F_{(3,69)}=3.5132$ ,  $p=0.0199$ , \* $p<0.05$  versus control, Tukey-Kramer HSD post-hoc; 50-75  $\mu\text{m}$  control=0.93±0.06, Nondep=0.82±0.04, Nondep DE=0.74±0.05, Nondep DE-RD=0.54±0.09 spines/ $\mu\text{m}$ ; one-way ANOVA  $F_{(3,68)}=5.6344$ ,  $p=0.0017$ , \* $p<0.05$  versus control, Tukey-Kramer HSD post-hoc; 75-100  $\mu\text{m}$ : control=1.04±0.03, Nondep=0.92±0.04, Nondep DE=0.86±0.05, Nondep DE-RD=0.57±0.09 spines/ $\mu\text{m}$ ; one-way ANOVA,  $F_{(3,61)}=9.7476$ ,  $p<0.0001$ , \* $p<0.05$  versus control, Tukey-Kramer HSD post-hoc; n=neurons, subjects).

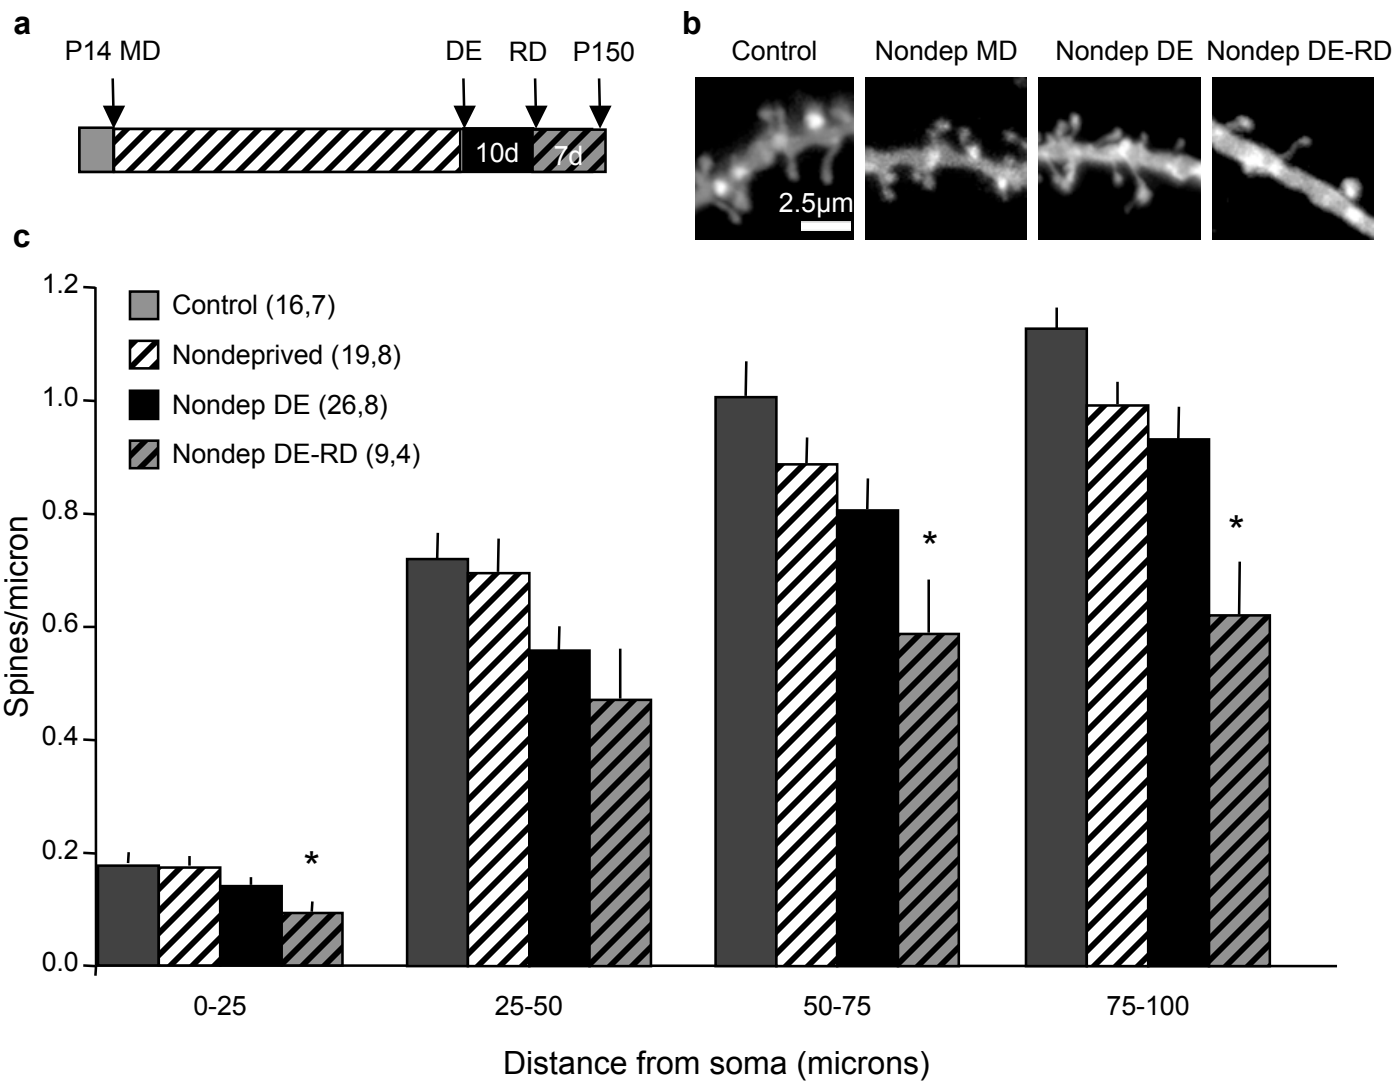

Supplement: NIHMS533400-supplement-01.pdf [file NIHMS533400-supplement-01.pdf]
